# Supplementary material for: The Effect of Butyrate-Supplemented Parenteral Nutrition on Intestinal Defence Mechanisms and the Parenteral Nutrition-Induced Shift in the Gut Microbiota in the Rat Model
Source: Hindawi journal article supplement (doi:10.1155/2019/7084734), 2019-02-28
Supplement: f1 [file 7084734.f1.pdf]

A

T-effectors

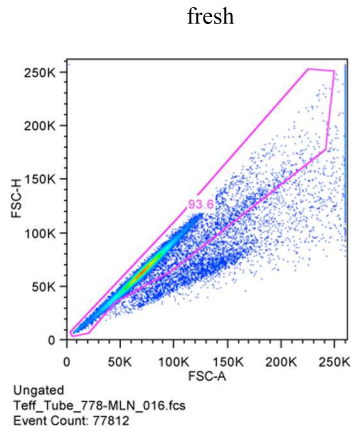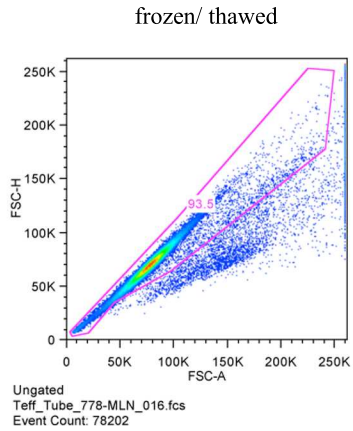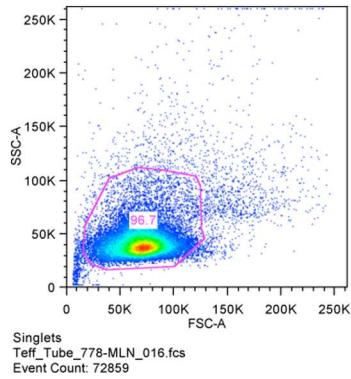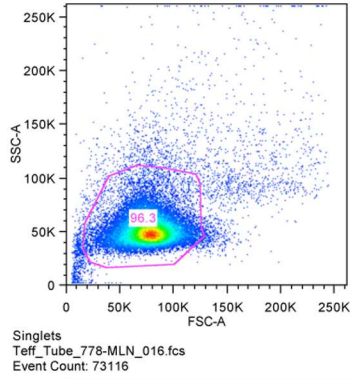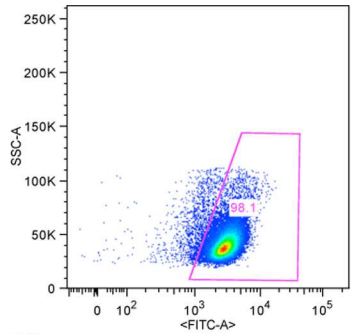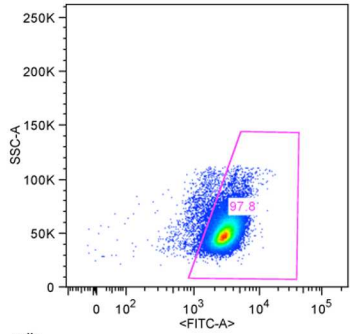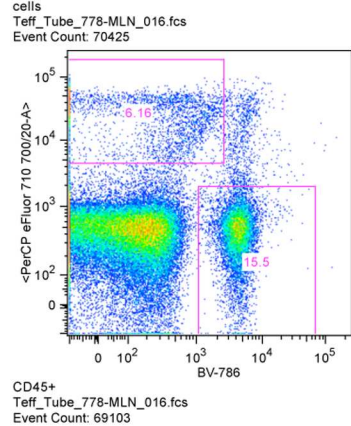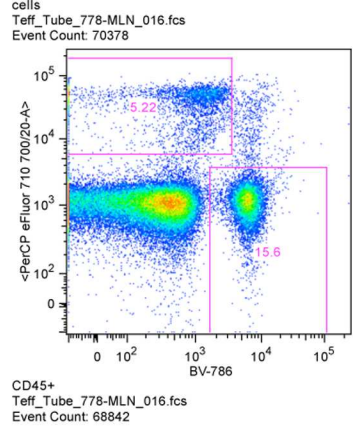

B

T-reg

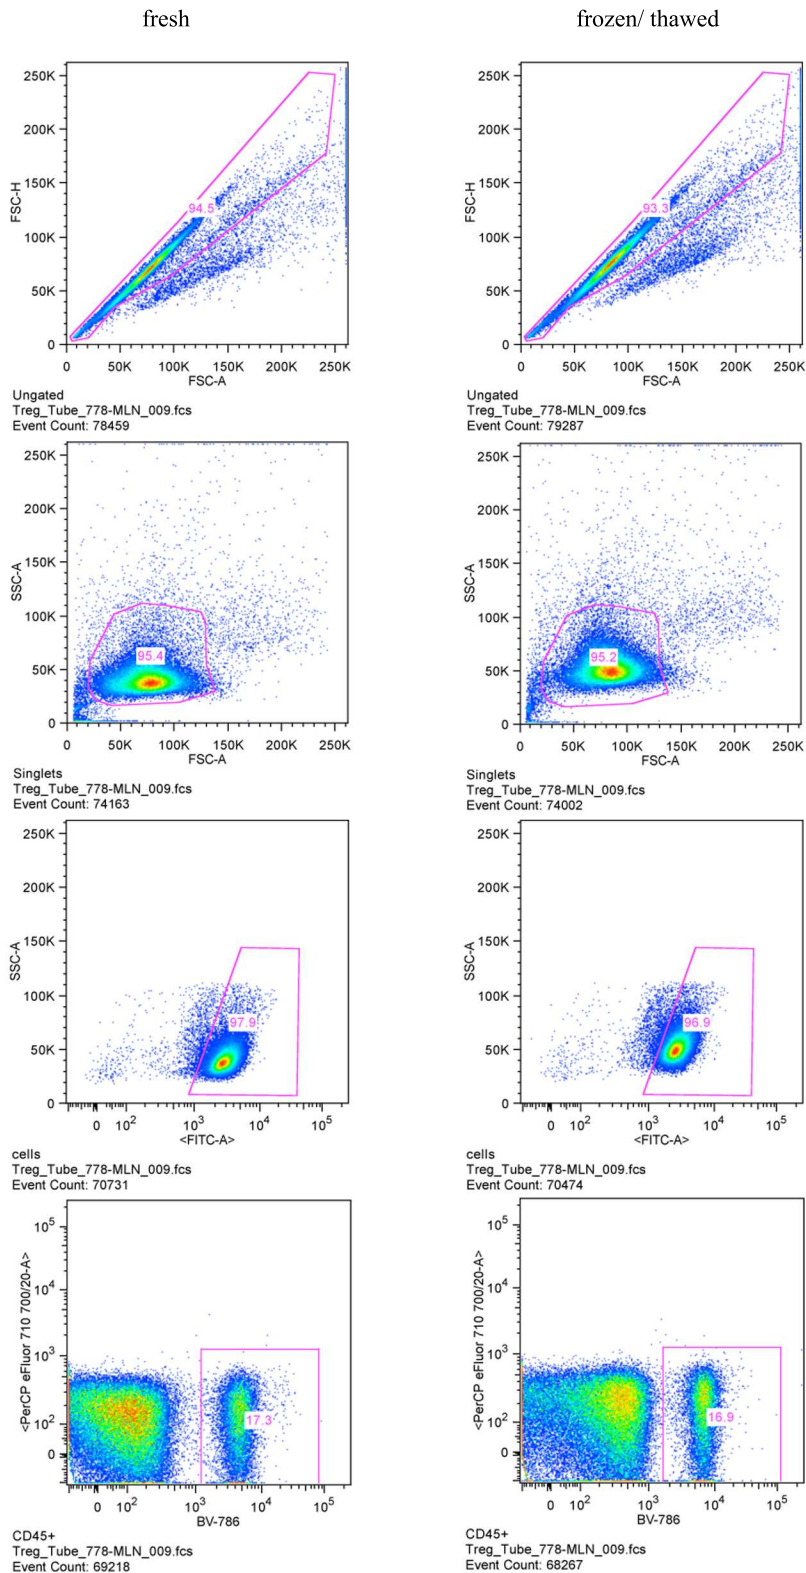

Figure S1: The effect of the one freezing/ thawing cycle on the lymphocyte antigens expression in effector (A) and regulatory (B) T cells.

**S1 Table Composition of parenteral nutrition mixture**

| Ingredients                            | kcal . kg <sup>-1</sup> . day <sup>-1</sup> | % of non-amino acid energy |
|----------------------------------------|---------------------------------------------|----------------------------|
| amino acid solution (Aminoplasmal 15%) | 5                                           |                            |
| glucose                                | 140                                         | 70                         |
| lipid emulsion (Intralipid 20%)        | 60                                          | 30                         |
| total energy                           | 205                                         |                            |

**Crude elements****Amino acid composition**

|               | mg . kg <sup>-1</sup> . day <sup>-1</sup> |
|---------------|-------------------------------------------|
| Isoleucine    | 47                                        |
| Leucine       | 91                                        |
| Lysine        | 64                                        |
| Methionine    | 46                                        |
| Phenylalanine | 46                                        |
| Threonine     | 43                                        |
| Tryptophan    | 17                                        |
| Valine        | 58                                        |
| Arginine      | 128                                       |
| Histidine     | 42                                        |
| Glycine       | 154                                       |
| Alanine       | 179                                       |
| Proline       | 59                                        |
| Aspartic acid | 64                                        |
| Cysteine      | 3                                         |
| Glutamic acid | 130                                       |
| Serine        | 24                                        |
| Tyrosine      | 4                                         |

**Vitamins**

|                                   | µg . kg <sup>-1</sup> . day <sup>-1</sup> |
|-----------------------------------|-------------------------------------------|
| Thiamin (B <sub>1</sub> )         | 124                                       |
| Riboflavin B <sub>2</sub> )       | 140                                       |
| Pyridoxine (B <sub>6</sub> )      | 155                                       |
| Cyancobalamine (B <sub>12</sub> ) | 0.2                                       |
| Nicotinamide                      | 1552                                      |
| Panthenic acid                    | 582                                       |
| Ascorbic acid (C)                 | 3880                                      |
| Biotin                            | 2.3                                       |
| Folic acid                        | 15.5                                      |

### Electrolytes

|                                             | mmol . kg <sup>-1</sup> . day <sup>-1</sup> |
|---------------------------------------------|---------------------------------------------|
| Na <sup>+</sup>                             | 15.6                                        |
| K <sup>+</sup>                              | 1.05                                        |
| Mg <sup>2+</sup>                            | 0.45                                        |
| Ca <sup>2+</sup>                            | 0.18                                        |
| Cl <sup>-</sup>                             | 16.1                                        |
| SO <sub>4</sub> <sup>2-</sup>               | 0.45                                        |
| HPO <sub>4</sub> <sup>2-</sup>              | 0.21                                        |
| H <sub>2</sub> PO <sub>4</sub> <sup>-</sup> | 0.11                                        |

### Trace elements

|                  | μmol . kg <sup>-1</sup> . day <sup>-1</sup> |
|------------------|---------------------------------------------|
| Cr <sup>3+</sup> | 0.008                                       |
| Cu <sup>2+</sup> | 0.233                                       |
| Fe <sup>3+</sup> | 0.776                                       |
| Mn <sup>2+</sup> | 0.039                                       |
| Mo <sup>6+</sup> | 0.008                                       |
| Se <sup>4+</sup> | 0.039                                       |
| Zn <sup>2+</sup> | 2.988                                       |
| I <sup>-</sup>   | 0.039                                       |
| F <sup>-</sup>   | 1.940                                       |

**Supplementary table S2** Statistical analysis of sequencing data: genus level

|                                                                                                         |
|---------------------------------------------------------------------------------------------------------|
|                                                                                                         |
| Bacteroidetes;D_2_Bacteroidia;D_3_Bacteroidales;D_4_Bacteroidaceae;D_5_Bacteroides                      |
| Bacteroidetes;D_2_Bacteroidia;D_3_Bacteroidales;D_4_Bacteroidales S24-7 uncultured bacterium            |
| Bacteroidetes;D_2_Bacteroidia;D_3_Bacteroidales;D_4_Porphyrromonadaceae;D_5_Parabacteroides             |
| Bacteroidetes;D_2_Bacteroidia;D_3_Bacteroidales;D_4_Prevotellaceae;D_5_Alloprevotella                   |
| Bacteroidetes;D_2_Bacteroidia;D_3_Bacteroidales;D_4_Prevotellaceae;D_5_Prevotellaceae Ga6A1 group       |
| Bacteroidetes;D_2_Bacteroidia;D_3_Bacteroidales;D_4_Prevotellaceae;D_5_Prevotellaceae NK3B31            |
| Bacteroidetes;D_2_Bacteroidia;D_3_Bacteroidales;D_4_Prevotellaceae;D_5_Prevotellaceae UCG-001           |
| Bacteroidetes;D_2_Bacteroidia;D_3_Bacteroidales;D_4_Rikenellaceae;D_5_Alistipes                         |
| Bacteroidetes;D_2_Bacteroidia;D_3_Bacteroidales;D_4_Rikenellaceae;D_5_Rikenellaceae RC9 gut group       |
| Cyanobacteria;D_2_Melainabacteria;D_3_Gastranaerophilales;D_4_uncultured bacterium                      |
| D_1_Firmicutes;D_2_Bacilli;D_3_Lactobacillales;D_4_Lactobacillaceae;D_5_Lactobacillus                   |
| Firmicutes;D_2_Clostridia;D_3_Clostridiales;D_4_Christensenellaceae;D_5_Christensenellaceae R-7 group   |
| Firmicutes;D_2_Clostridia;D_3_Clostridiales;D_4_Lachnospiraceae;D_5_Anaerostipes                        |
| Firmicutes;D_2_Clostridia;D_3_Clostridiales;D_4_Lachnospiraceae;D_5_Blautia                             |
| Firmicutes;D_2_Clostridia;D_3_Clostridiales;D_4_Lachnospiraceae;D_5_Coproccoccus                        |
| Firmicutes;D_2_Clostridia;D_3_Clostridiales;D_4_Lachnospiraceae;D_5_Coproccoccus                        |
| Firmicutes;D_2_Clostridia;D_3_Clostridiales;D_4_Lachnospiraceae;D_5_Incertae sedis                      |
| Firmicutes;D_2_Clostridia;D_3_Clostridiales;D_4_Lachnospiraceae;D_5_Lachnoclostridium                   |
| Firmicutes;D_2_Clostridia;D_3_Clostridiales;D_4_Lachnospiraceae;D_5_Lachnospiraceae AC2044              |
| Firmicutes;D_2_Clostridia;D_3_Clostridiales;D_4_Lachnospiraceae;D_5_Lachnospiraceae NC2004              |
| Firmicutes;D_2_Clostridia;D_3_Clostridiales;D_4_Lachnospiraceae;D_5_Lachnospiraceae NK4A136             |
| Firmicutes;D_2_Clostridia;D_3_Clostridiales;D_4_Lachnospiraceae;D_5_Lachnospiraceae UCG-001             |
| Firmicutes;D_2_Clostridia;D_3_Clostridiales;D_4_Lachnospiraceae;D_5_Roseburia                           |
| Firmicutes;D_2_Clostridia;D_3_Clostridiales;D_4_Lachnospiraceae;D_5_uncultured                          |
| Firmicutes;D_2_Clostridia;D_3_Clostridiales;D_4_Lachnospiraceae;Other                                   |
| Firmicutes;D_2_Clostridia;D_3_Clostridiales;D_4_Peptococcaceae;D_5_uncultured                           |
| Firmicutes;D_2_Clostridia;D_3_Clostridiales;D_4_Peptostreptococcaceae;D_5_Peptoclostridium              |
| Firmicutes;D_2_Clostridia;D_3_Clostridiales;D_4_Ruminococcaceae;D_5_Oscillibacter                       |
| Firmicutes;D_2_Clostridia;D_3_Clostridiales;D_4_Ruminococcaceae;D_5_Ruminiclostridium                   |
| Firmicutes;D_2_Clostridia;D_3_Clostridiales;D_4_Ruminococcaceae;D_5_Ruminococcaceae NK4A214             |
| Firmicutes;D_2_Clostridia;D_3_Clostridiales;D_4_Ruminococcaceae;D_5_Ruminococcaceae UCG-005             |
| Firmicutes;D_2_Clostridia;D_3_Clostridiales;D_4_Ruminococcaceae;D_5_Ruminococcaceae UCG-014             |
| Firmicutes;D_2_Clostridia;D_3_Clostridiales;D_4_Ruminococcaceae;D_5_Ruminococcus                        |
| Firmicutes;D_2_Clostridia;D_3_Clostridiales;D_4_Ruminococcaceae;D_5_[Eubacterium] coprostan group       |
| Firmicutes;D_2_Clostridia;D_3_Clostridiales;D_4_Ruminococcaceae;D_5_uncultured                          |
| Firmicutes;D_2_Erysipelotrichia;D_3_Erysipelotrichales;D_4_Erysipelotrichaceae;D_5_Allobaculum          |
| Firmicutes;D_2_Erysipelotrichia;D_3_Erysipelotrichales;D_4_Erysipelotrichaceae;D_5_Candidatus Stoquefic |
| Firmicutes;D_2_Erysipelotrichia;D_3_Erysipelotrichales;D_4_Erysipelotrichaceae;D_5_Turicibacter         |
| Firmicutes;D_2_Erysipelotrichia;D_3_Erysipelotrichales;D_4_Erysipelotrichaceae;Other                    |
| Proteobacteria;D_2_Alphaproteobacteria;D_3_Rhodospirillales;D_4_Rhodospirillaceae;D_5_Thalassospira     |

|                                                                                                          |
|----------------------------------------------------------------------------------------------------------|
| Proteobacteria;D_2__Betaproteobacteria;D_3__Burkholderiales;D_4__Alcaligenaceae;D_5__Parasutterella      |
| Proteobacteria;D_2__Deltaproteobacteria;D_3__Desulfovibrionales;D_4__Desulfovibrionaceae;D_5__Desulfovib |
| Proteobacteria;D_2__Gammaproteobacteria;D_3__Enterobacteriales;D_4__Enterobacteriaceae;D_5__Escherichi   |
| Proteobacteria;D_2__Gammaproteobacteria;D_3__Enterobacteriales;D_4__Enterobacteriaceae;Other             |
| Verrucomicrobia;D_2__Verrucomicrobiae;D_3__Verrucomicrobiales;D_4__Verrucomicrobiaceae;D_5__Akkerma      |
| Unassigned;Other;Other;Other;Other;Other                                                                 |

| Fitted ANOVA model  |        |        |         |                  | Tukey's HSD pairwise comparis     |               |              |                   |
|---------------------|--------|--------|---------|------------------|-----------------------------------|---------------|--------------|-------------------|
| Coefficients        |        |        |         |                  | Effect size: fold change (95% CI) |               |              |                   |
| Intercept (control) | PN+But | PN     | p-value | adjusted p-value | PN+But to control                 | PN to control | PN+But to PN | PN+But to control |
| -0.214              | 4.574  | 2.944  | 0.001   | 0.010            | 4.574                             | 2.944         | -1.629       | 0.001             |
| 3.842               | -1.003 | -0.884 | 0.222   | 0.387            | -1.003                            | -0.884        | 0.119        | 0.257             |
| -2.571              | 3.730  | 3.973  | 0.000   | 0.005            | 3.730                             | 3.973         | 0.243        | 0.000             |
| -1.459              | 0.945  | -0.992 | 0.568   | 0.653            | 0.945                             | -0.992        | -1.937       | 0.846             |
| 2.814               | -3.390 | -0.869 | 0.004   | 0.029            | -3.390                            | -0.869        | 2.521        | 0.003             |
| 2.203               | -2.312 | -2.944 | 0.002   | 0.020            | -2.312                            | -2.944        | -0.632       | 0.014             |
| 2.105               | -0.146 | -0.979 | 0.579   | 0.653            | -0.146                            | -0.979        | -0.832       | 0.988             |
| -0.371              | 2.164  | 1.679  | 0.008   | 0.046            | 2.164                             | 1.679         | -0.485       | 0.009             |
| -0.731              | 0.731  | 0.727  | 0.681   | 0.727            | 0.731                             | 0.727         | -0.004       | 0.732             |
| 0.840               | -1.486 | 1.607  | 0.015   | 0.069            | -1.486                            | 1.607         | 3.093        | 0.231             |
| 0.648               | -3.128 | -2.088 | 0.028   | 0.082            | -3.128                            | -2.088        | 1.041        | 0.026             |
| -1.203              | 0.847  | 0.135  | 0.485   | 0.633            | 0.847                             | 0.135         | -0.712       | 0.488             |
| 0.148               | -1.658 | -4.118 | 0.001   | 0.008            | -1.658                            | -4.118        | -2.459       | 0.118             |
| 0.182               | 1.194  | 1.214  | 0.280   | 0.425            | 1.194                             | 1.214         | 0.020        | 0.361             |
| -0.713              | -0.212 | 0.486  | 0.562   | 0.653            | -0.212                            | 0.486         | 0.699        | 0.939             |
| -1.083              | 1.083  | 0.217  | 0.597   | 0.653            | 1.083                             | 0.217         | -0.866       | 0.592             |
| 0.221               | -1.398 | -1.591 | 0.338   | 0.497            | -1.398                            | -1.591        | -0.193       | 0.463             |
| 0.016               | 0.326  | -1.068 | 0.087   | 0.194            | 0.326                             | -1.068        | -1.394       | 0.841             |
| -1.212              | 1.445  | -0.785 | 0.038   | 0.099            | 1.445                             | -0.785        | -2.230       | 0.166             |
| 0.039               | -1.342 | -1.252 | 0.370   | 0.499            | -1.342                            | -1.252        | 0.091        | 0.425             |
| 3.480               | -2.164 | -2.043 | 0.055   | 0.136            | -2.164                            | -2.043        | 0.121        | 0.081             |
| 0.135               | -1.665 | -1.872 | 0.130   | 0.266            | -1.665                            | -1.872        | -0.207       | 0.225             |
| 0.278               | 0.919  | -0.737 | 0.078   | 0.183            | 0.919                             | -0.737        | -1.657       | 0.348             |
| 2.377               | -1.190 | -0.753 | 0.243   | 0.394            | -1.190                            | -0.753        | 0.437        | 0.227             |
| 0.364               | -1.417 | -1.075 | 0.165   | 0.310            | -1.417                            | -1.075        | 0.342        | 0.170             |
| -0.377              | 1.273  | 0.087  | 0.110   | 0.235            | 1.273                             | 0.087         | -1.186       | 0.128             |
| 0.238               | -0.252 | 0.413  | 0.573   | 0.653            | -0.252                            | 0.413         | 0.665        | 0.907             |
| 0.095               | -0.765 | -0.057 | 0.366   | 0.499            | -0.765                            | -0.057        | 0.708        | 0.391             |
| 1.251               | -0.287 | 0.068  | 0.862   | 0.881            | -0.287                            | 0.068         | 0.355        | 0.903             |
| -1.050              | 0.748  | 1.381  | 0.014   | 0.069            | 0.748                             | 1.381         | 0.632        | 0.185             |
| -0.340              | -0.184 | 1.353  | 0.007   | 0.044            | -0.184                            | 1.353         | 1.537        | 0.899             |
| 0.240               | -0.473 | 0.076  | 0.553   | 0.653            | -0.473                            | 0.076         | 0.549        | 0.640             |
| 0.801               | -2.283 | -1.355 | 0.021   | 0.081            | -2.283                            | -1.355        | 0.929        | 0.017             |
| -0.665              | 1.018  | 1.300  | 0.028   | 0.082            | 1.018                             | 1.300         | 0.282        | 0.096             |
| 1.395               | -0.142 | 0.662  | 0.372   | 0.499            | -0.142                            | 0.662         | 0.804        | 0.966             |
| -1.543              | 1.232  | 2.809  | 0.030   | 0.082            | 1.232                             | 2.809         | 1.577        | 0.399             |
| -1.749              | 0.686  | -1.816 | 0.233   | 0.392            | 0.686                             | -1.816        | -2.502       | 0.873             |
| -0.897              | -1.089 | 0.333  | 0.274   | 0.425            | -1.089                            | 0.333         | 1.422        | 0.427             |
| -0.789              | -0.556 | -1.730 | 0.202   | 0.365            | -0.556                            | -1.730        | -1.174       | 0.820             |
| -1.498              | 0.634  | 2.258  | 0.138   | 0.270            | 0.634                             | 2.258         | 1.624        | 0.826             |

|        |        |        |       |       |        |        |        |       |
|--------|--------|--------|-------|-------|--------|--------|--------|-------|
| -1.135 | 2.046  | 2.618  | 0.000 | 0.005 | 2.046  | 2.618  | 0.572  | 0.002 |
| -0.825 | 0.373  | 3.375  | 0.021 | 0.081 | 0.373  | 3.375  | 3.002  | 0.940 |
| -2.896 | 3.979  | 3.590  | 0.024 | 0.082 | 3.979  | 3.590  | -0.389 | 0.035 |
| -0.716 | -0.609 | -1.496 | 0.591 | 0.653 | -0.609 | -1.496 | -0.886 | 0.906 |
| 1.648  | -1.717 | -3.521 | 0.026 | 0.082 | -1.717 | -3.521 | 1.804  | 0.313 |
| 0.200  | 0.320  | 0.420  | 0.724 | 0.756 | 0.320  | 0.420  | 0.100  | 0.830 |



| ion              |                 |
|------------------|-----------------|
| p-values         |                 |
| PN<br>to control | PN+But<br>to PN |
| 0.019            | 0.250           |
| 0.340            | 0.981           |
| 0.000            | 0.944           |
| 0.832            | 0.538           |
| 0.558            | 0.030           |
| 0.003            | 0.666           |
| 0.584            | 0.696           |
| 0.039            | 0.729           |
| 0.735            | 1.000           |
| 0.186            | 0.011           |
| 0.150            | 0.615           |
| 0.981            | 0.622           |
| 0.000            | 0.023           |
| 0.349            | 1.000           |
| 0.724            | 0.550           |
| 0.978            | 0.732           |
| 0.376            | 0.986           |
| 0.191            | 0.089           |
| 0.557            | 0.033           |
| 0.472            | 0.996           |
| 0.102            | 0.991           |
| 0.160            | 0.977           |
| 0.496            | 0.065           |
| 0.529            | 0.816           |
| 0.339            | 0.897           |
| 0.989            | 0.185           |
| 0.772            | 0.550           |
| 0.994            | 0.473           |
| 0.994            | 0.867           |
| 0.011            | 0.316           |
| 0.016            | 0.010           |
| 0.988            | 0.579           |
| 0.176            | 0.445           |
| 0.031            | 0.821           |
| 0.491            | 0.389           |
| 0.023            | 0.264           |
| 0.410            | 0.228           |
| 0.919            | 0.277           |
| 0.182            | 0.460           |
| 0.126            | 0.343           |

|       |       |
|-------|-------|
| 0.000 | 0.503 |
| 0.024 | 0.052 |
| 0.058 | 0.962 |
| 0.563 | 0.826 |
| 0.021 | 0.062 |
| 0.728 | 0.983 |
